# Supplementary material for: Immunogenicity and safety of an intradermal ChAdOx1 nCoV-19 boost in a healthy population
Source: PubMed Central journal article supplement (PMC9106663; doi:10.1038/s41541-022-00475-z), 2022-05-13
Supplement: 41541_2022_475_MOESM1_ESM.pdf [file 41541_2022_475_MOESM1_ESM.pdf]

## Supplementary

**Supplementary Table 1. Amino acid sequences of SARS-CoV-2 S1 peptides (ProImmune).**

| Peptide number | Amino acid start position | Sequence         |
|----------------|---------------------------|------------------|
| 1              | 1                         | MFVFLVLLPLVSSQC  |
| 2              | 6                         | VLLPLVSSQCVNLTT  |
| 3              | 11                        | VSSQCVNLTTTRTQLP |
| 4              | 16                        | VNLTTTRTQLPPAYTN |
| 5              | 21                        | RTQLPPAYTNSFTRG  |
| 6              | 26                        | PAYTNSFTRGVYYPD  |
| 7              | 31                        | SFTRGVYYPDKVFRS  |
| 8              | 36                        | VYYPDKVFRSSVLHS  |
| 9              | 41                        | KVFRSSVLHSTQDLF  |
| 10             | 46                        | SVLHSTQDLFLPFFS  |
| 11             | 51                        | TQDLFLPFFSNVTWF  |
| 12             | 56                        | LPFFSNVTWFHAIHV  |
| 13             | 61                        | NVTWFHAIHVSGTNG  |
| 14             | 66                        | HAIHVSGTNGTKRFD  |
| 15             | 71                        | SGTNGTKRFDNPVLP  |
| 16             | 76                        | TKRFDNPVLPFNDGV  |
| 17             | 81                        | NPVLPFNDGVYFAST  |
| 18             | 86                        | FNDGVYFASTEKSNI  |
| 19             | 91                        | YFASTEKSNIIRGWI  |
| 20             | 96                        | EKSNIIRGWIFGTTL  |
| 21             | 101                       | IRGWIFGTTLDSKTQ  |
| 22             | 106                       | FGTTLDSKTQSLIV   |
| 23             | 111                       | DSKTQSLIVNNATN   |
| 24             | 116                       | SLIVNNATNVVIKV   |
| 25             | 121                       | NNATNVVIKVCEFQF  |
| 26             | 126                       | VVIKVCEFQFCNDPF  |
| 27             | 131                       | CEFQFCNDPFLGVYY  |
| 28             | 136                       | CNDPFLGVYYHKNNK  |
| 29             | 141                       | LGVYYHKNNKSWMES  |
| 30             | 146                       | HKNNKSWMESEFRVY  |
| 31             | 151                       | SWMESEFRVYSSANN  |
| 32             | 156                       | EFRVYSSANNCTFEY  |

| <b>Peptide number</b> | <b>Amino acid start position</b> | <b>Sequence</b> |
|-----------------------|----------------------------------|-----------------|
| 33                    | 161                              | SSANNCTFEYVSQPF |
| 34                    | 166                              | CTFEYVSQPFLMDLE |
| 35                    | 171                              | VSQPFLMDLEGKQGN |
| 36                    | 176                              | LMDLEGKQGNFKNLR |
| 37                    | 181                              | GKQGNFKNLREFVFK |
| 38                    | 186                              | FKNLREFVFKNIDGY |
| 39                    | 191                              | EFVFKNIDGYFKIYS |
| 40                    | 196                              | NIDGYFKIYSKHTPI |
| 41                    | 201                              | FKIYSKHTPINLVRD |
| 42                    | 206                              | KHTPINLVRDLPQGF |
| 43                    | 211                              | NLVRDLPQGFSALEP |
| 44                    | 216                              | LPQGFSALEPLVDLP |
| 45                    | 221                              | SALEPLVDLPIGINI |
| 46                    | 226                              | LVDLPIGINITRFQT |
| 47                    | 231                              | IGINITRFQTLLALH |
| 48                    | 236                              | TRFQTLLALHRSYLT |
| 49                    | 241                              | LLALHRSYLTPGDSS |
| 50                    | 246                              | RSYLTPGDSSSGWTA |
| 51                    | 251                              | PGDSSSGWTAGAAAY |
| 52                    | 256                              | SGWTAGAAAYVGYL  |
| 53                    | 261                              | GAAAYVGYLQPRTF  |
| 54                    | 266                              | YVGYLQPRTFLLKYN |
| 55                    | 271                              | QPRTFLLKYNENGTI |
| 56                    | 276                              | LLKYNENGTITDAVD |
| 57                    | 281                              | ENGTITDAVDCALDP |
| 58                    | 286                              | TDAVDCALDPLSETK |
| 59                    | 291                              | CALDPLSETKCTLKS |
| 60                    | 296                              | LSETKCTLKSFTVEK |
| 61                    | 301                              | CTLKSFTVEKGIYQT |
| 62                    | 306                              | FTVEKGIYQTSNFRV |
| 63                    | 311                              | GIYQTSNFRVQPTES |
| 64                    | 316                              | SNFRVQPTESIVRFP |
| 65                    | 321                              | QPTESIVRFPNITNL |
| 66                    | 326                              | IVRFPNITNLCPFGE |
| 67                    | 331                              | NITNLCPFGEVFNAT |
| 68                    | 336                              | CPFGEVFNATRFASV |
| 69                    | 341                              | VFNATRFASVYAWNR |

| <b>Peptide number</b> | <b>Amino acid start position</b> | <b>Sequence</b> |
|-----------------------|----------------------------------|-----------------|
| 70                    | 346                              | RFASVYAWNRKRISN |
| 71                    | 351                              | YAWNRKRISNCVADY |
| 72                    | 356                              | KRISNCVADYSVLYN |
| 73                    | 361                              | CVADYSVLYNSASFS |
| 74                    | 366                              | SVLYNSASFSTFKCY |
| 75                    | 371                              | SASFSTFKCYGVSPT |
| 76                    | 376                              | TFKCYGVSPTKLNDL |
| 77                    | 381                              | GVSPTKLNDLCFTNV |
| 78                    | 386                              | KLNDLCFTNVYADSF |
| 79                    | 391                              | CFTNVYADSFVIRGD |
| 80                    | 396                              | YADSFVIRGDEVRQI |
| 81                    | 401                              | VIRGDEVRQIAPGQT |
| 82                    | 406                              | EVRQIAPGQTGKIAD |
| 83                    | 411                              | APGQTGKIADYNYKL |
| 84                    | 416                              | GKIADYNYKLPDDFT |
| 85                    | 421                              | YNYKLPDDFTGCVIA |
| 86                    | 426                              | PDDFTGCVIAWNSNN |
| 87                    | 431                              | GCVIAWNSNNLDSKV |
| 88                    | 436                              | WNSNNLDSKVGGNYN |
| 89                    | 441                              | LDSKVGGNYNLYRL  |
| 90                    | 446                              | GGNYNLYRLFRKSN  |
| 91                    | 451                              | YLYRLFRKSNLKPFE |
| 92                    | 456                              | FRKSNLKPFERDIST |
| 93                    | 461                              | LKPFERDISTEIYQA |
| 94                    | 466                              | RDISTEIYQAGSTPC |
| 95                    | 471                              | EIYQAGSTPCNGVEG |
| 96                    | 476                              | GSTPCNGVEGFNCYF |
| 97                    | 481                              | NGVEGFNCYFPLQSY |
| 98                    | 486                              | FNCYFPLQSYGFQPT |
| 99                    | 491                              | PLQSYGFQPTNGVGY |
| 100                   | 496                              | GFQPTNGVGYQPYRV |
| 101                   | 501                              | NGVGYQPYRVVLSF  |
| 102                   | 506                              | QPYRVVLSFELLHA  |
| 103                   | 511                              | VVLSFELLHAPATVC |
| 104                   | 516                              | ELLHAPATVCGPKKS |
| 105                   | 521                              | PATVCGPKKSTNLVK |
| 106                   | 526                              | GPKKSTNLVKNKCVN |

| <b>Peptide number</b> | <b>Amino acid start position</b> | <b>Sequence</b>  |
|-----------------------|----------------------------------|------------------|
| 107                   | 531                              | TNLVKNKCVNFNFNFG |
| 108                   | 536                              | NKCVNFNFNGLTGTG  |
| 109                   | 541                              | FNFNGLTGTGVLTES  |
| 110                   | 546                              | LTGTGVLTESNKKFL  |
| 111                   | 551                              | VLTESNKKFLPFQQF  |
| 112                   | 556                              | NKKFLPFQQFGRDIA  |
| 113                   | 561                              | PFQQFGRDIADTTDA  |
| 114                   | 566                              | GRDIADTTDAVRDPQ  |
| 115                   | 571                              | DTTDAVRDPQTLEIL  |
| 116                   | 576                              | VRDPQTLEILDITPC  |
| 117                   | 581                              | TLEILDITPCSFGGV  |
| 118                   | 586                              | DITPCSFGGVSVITP  |
| 119                   | 591                              | SFGGVSVITPGTNTS  |
| 120                   | 596                              | SVITPGTNTSNQVAV  |
| 121                   | 601                              | GTNTSNQVAVLYQDV  |
| 122                   | 606                              | NQVAVLYQDVNCTEV  |
| 123                   | 611                              | LYQDVNCTEVPVAIH  |
| 124                   | 616                              | NCTEVPVAIHADQLT  |
| 125                   | 621                              | PVAIHADQLTPTWRV  |
| 126                   | 626                              | ADQLTPTWRVYSTGS  |
| 127                   | 631                              | PTWRVYSTGSNVFQT  |
| 128                   | 636                              | YSTGSNVFQTRAGCL  |
| 129                   | 641                              | NVFQTRAGCLIGAETH |
| 130                   | 646                              | RAGCLIGAETHVNNSY |
| 131                   | 651                              | IGAETHVNNSYECDIP |
| 132                   | 656                              | VNNSYECDIPIGAGI  |
| 133                   | 661                              | ECDIPIGAGICASYQ  |
| 134                   | 666                              | IGAGICASYQTQNS   |

**Supplementary Table 2. Fluorochrome conjugated antibodies for flow cytometry analysis.**

| Antibody  | Common Fluorochrome | Dilution | Clone  | Source        |
|-----------|---------------------|----------|--------|---------------|
| CD3       | PerCP               | 1:50     | SP34-2 | BD Horizon    |
| CD4       | APC-H7              | 1:200    | SK3    | BD            |
| CD8       | APC                 | 1:200    | SK1    | BD            |
| L/D       | Aqua                | 1:1000   | -      | Invitrogen    |
| INF-Gamma | PE-Cy7              | 1:100    | B27    | BD Pharmingen |
| TNF-alpha | PE-CF594            | 1:100    | MAb11  | BD Horizon    |

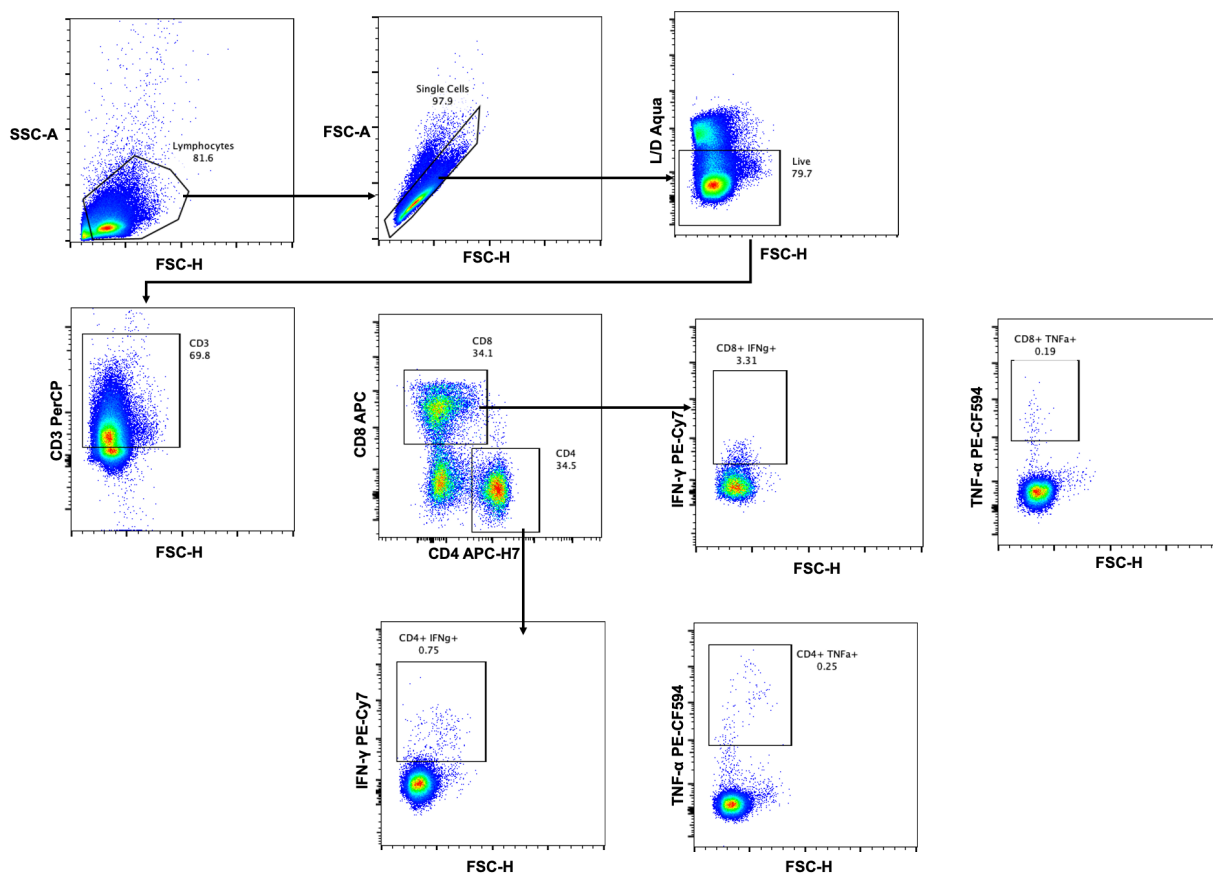

**Supplementary Figure 1. Gating strategy for the effector cytokine production of T cells after boosting**
